# Supplementary material for: A macroeconomic assessment of the impact of medical research expenditure: A case study of NIHR Biomedical Research Centres
Source: PubMed Central journal article supplement (PMC6457483; doi:10.1371/journal.pone.0214361), 2019-04-10
Supplement: pone.0214361.s002.pdf [file pone.0214361.s002.pdf]

Table 1: Matrix of technical coefficients and interdependencies.

|                     | <b>Agri.</b> | <b>Prod.</b> | <b>Con.</b> | <b>Dist.</b> | <b>Info.</b> | <b>Finan.</b> | <b>Prop.</b> | <b>Prof.</b> | <b>Health</b> | <b>Other</b> |
|---------------------|--------------|--------------|-------------|--------------|--------------|---------------|--------------|--------------|---------------|--------------|
| <b>Agriculture</b>  | 0.0907       | 0.0093       | 0.0013      | 0.0047       | 0.0001       | 0.0000        | 0.0000       | 0.0000       | 0.0002        | 0.0001       |
| <b>Production</b>   | 0.2274       | 0.2464       | 0.1673      | 0.2348       | 0.0849       | 0.0314        | 0.0085       | 0.0332       | 0.1029        | 0.0530       |
| <b>Construction</b> | 0.0162       | 0.0040       | 0.2243      | 0.0567       | 0.0087       | 0.0178        | 0.0790       | 0.0048       | 0.0037        | 0.0076       |
| <b>Distribution</b> | 0.0275       | 0.0110       | 0.0143      | 0.1898       | 0.0227       | 0.0794        | 0.0023       | 0.02187      | 0.0237        | 0.0153       |
| <b>Information</b>  | 0.0065       | 0.0056       | 0.0091      | 0.0537       | 0.1009       | 0.0725        | 0.0058       | 0.0271       | 0.0115        | 0.0350       |
| <b>Financial</b>    | 0.0320       | 0.0129       | 0.0150      | 0.0381       | 0.0159       | 0.1241        | 0.1235       | 0.0202       | 0.0037        | 0.0112       |
| <b>Property</b>     | 0.0018       | 0.0009       | 0.0061      | 0.0396       | 0.0049       | 0.0168        | 0.0030       | 0.0026       | 0.0045        | 0.0045       |
| <b>Professional</b> | 0.0135       | 0.0187       | 0.0780      | 0.1583       | 0.1070       | 0.1568        | 0.0200       | 0.1921       | 0.0453        | 0.0849       |
| <b>Health</b>       | 0.0003       | 0.0007       | 0.0008      | 0.0051       | 0.0058       | 0.0094        | 0.0006       | 0.0085       | 0.0962        | 0.0050       |
| <b>Other</b>        | 0.0015       | 0.0005       | 0.0002      | 0.0064       | 0.0163       | 0.0073        | 0.0003       | 0.0054       | 0.0064        | 0.0909       |

Table note: Agri=Agriculture; Prod=Production; Con=Construction; Dist=Distribution; Info=Information;  
 Finan=Financial Prop=Property; Prof=Professional
